# Supplementary material for: Impacts of Quarterly Sow Mass Vaccination with a Porcine Reproductive and Respiratory Syndrome Virus Type 1 (PRRSV-1) Modified Live Vaccine in Two Herds
Source: MDPI journal article supplement (doi:10.3390/vaccines9101057), 2021-09-23
Supplement: s1 [file s1]

Figure S1 – PRRSV MLV vaccine doses sold in DK. Doses (y-axis, expressed x1000) of sold PRRSV MLV vaccines in Denmark from January 2017 until January 2021 (x-axis).

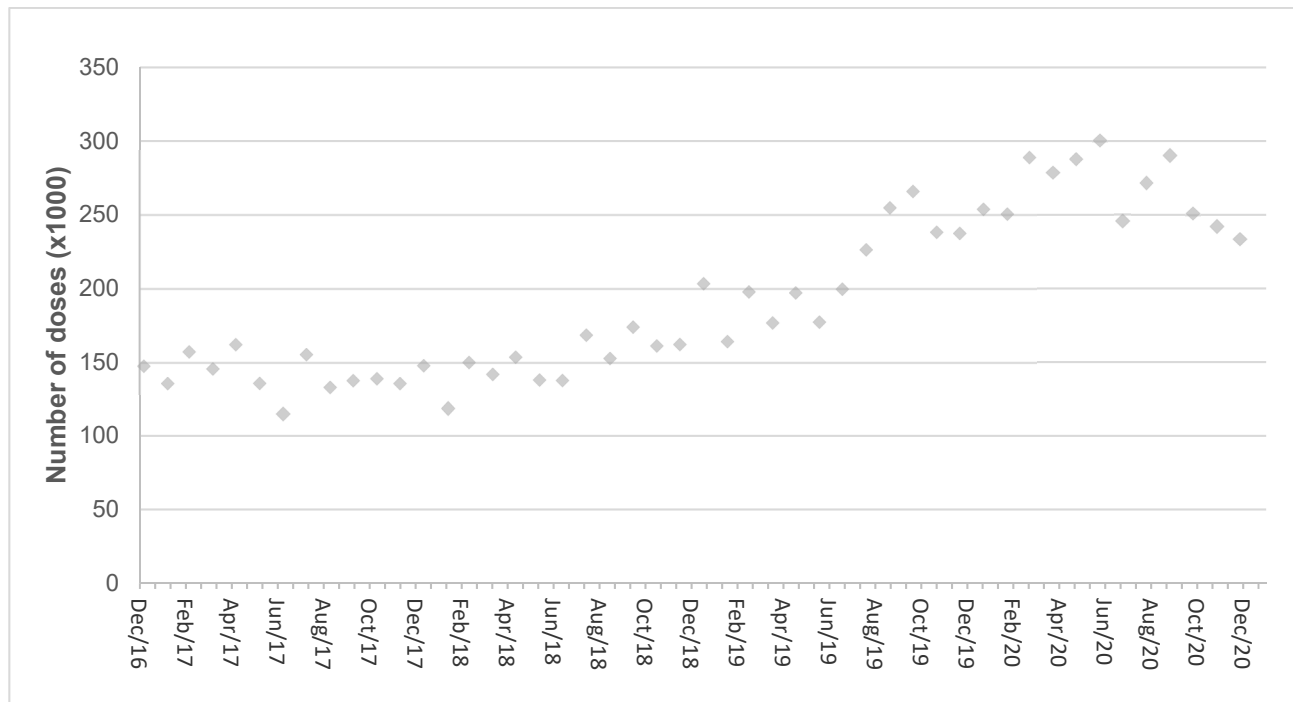

Figure S2 – Flow of pigs in between the herds in the study.

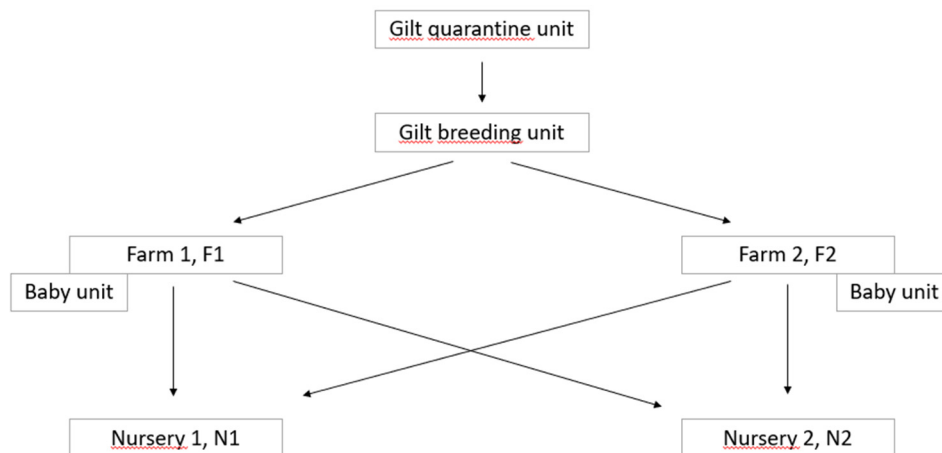

Table S1 – RT-qPCR and serologic assay (Idexx ELISA and MFIA) results. Herd are either farm 1 (F1) or 2 (F2), or nursery herd 1 (N1) or 2 (N2). Sampling date are given, and vaccination date for the sow herds with Porcilis PRRS was 05-12-2019. Number corresponds to either sow number in sow farms or section in nursery herds. Material are B = blood, Y= udder wipe, S = oral fluid. Remark corresponds to the detected PRRS virus.

| Herd | Sampling date | Number | Material | Result, Cq | Remark | Idexx ELISA, S/P | MFIA-PRRSV1, S/P | MFIA-PRRSV2, S/P | MFIA-ratio |
|------|---------------|--------|----------|------------|--------|------------------|------------------|------------------|------------|
| F1   | 03-12-2019    | 3602   | B        | 0          |        | 0.76             | 0.49             | 0.25             | -0.7       |
| F1   | 03-12-2019    | 3989   | B        | 0          |        | 0.84             | 0.2              | 0.3              | 0.4        |
| F1   | 03-12-2019    | 3990   | B        | 0          |        | 1.27             | 0.58             | 0.49             | -0.2       |
| F1   | 03-12-2019    | 3991   | B        | 0          |        | 1.25             | 0.49             | 0.43             | -0.1       |

|    |            |       |   |   |      |      |      |      |
|----|------------|-------|---|---|------|------|------|------|
| F1 | 03-12-2019 | 3992  | B | 0 | 0.54 | 0.06 | 0.19 | -    |
| F1 | 03-12-2019 | 3993  | B | 0 | 1.26 | 0.62 | 0.58 | -0.1 |
| F1 | 03-12-2019 | 3994  | B | 0 | 1.13 | 0.58 | 0.52 | -0.1 |
| F1 | 03-12-2019 | 3995  | B | 0 | 1.8  | 0.95 | 0.85 | -0.1 |
| F1 | 03-12-2019 | 3996  | B | 0 | 0.73 | 0.37 | 0.23 | -0.5 |
| F1 | 03-12-2019 | 3997  | B | 0 | 1.32 | 0.61 | 0.51 | -0.2 |
| F1 | 03-12-2019 | 3999  | B | 0 | 0.94 | 0.39 | 0.39 | 0    |
| F1 | 03-12-2019 | 4000  | B | 0 | 1.24 | 0.53 | 0.55 | 0    |
| F1 | 03-12-2019 | 1984  | B | 0 | 0.48 | 0.32 | 0.22 | -0.4 |
| F1 | 03-12-2019 | 1478  | B | 0 | 2.15 | 1.15 | 0.99 | -0.1 |
| F1 | 03-12-2019 | 1885  | B | 0 | 1.57 | 0.84 | 0.6  | -0.3 |
| F1 | 03-12-2019 | 1207  | B | 0 | 1.54 | 0.78 | 0.64 | -0.2 |
| F1 | 03-12-2019 | 2076  | B | 0 | 1.1  | 0.94 | 0.69 | -0.3 |
| F1 | 03-12-2019 | 2050  | B | 0 | 1.64 | 1.02 | 0.73 | -0.3 |
| F1 | 03-12-2019 | 1996  | B | 0 | 1.21 | 0.78 | 0.61 | -0.2 |
| F1 | 03-12-2019 | 1566  | B | 0 | 1.1  | 0.79 | 0.63 | -0.2 |
| F1 | 03-12-2019 | 10196 | B | 0 | 1.2  | 0.76 | 0.59 | -0.3 |
| F1 | 03-12-2019 | 2011  | B | 0 | 1.49 | 0.93 | 0.84 | -0.1 |
| F1 | 03-12-2019 | 2504  | B | 0 | 1.83 | 0.95 | 0.82 | -0.1 |
| F1 | 03-12-2019 | 2484  | B | 0 | 0.9  | 0.63 | 0.52 | -0.2 |
| F1 | 03-12-2019 | 2441  | B | 0 | 0.99 | 0.64 | 0.39 | -0.5 |
| F1 | 03-12-2019 | 2461  | B | 0 | 2.02 | 1.06 | 0.86 | -0.2 |
| F1 | 03-12-2019 | 3006  | B | 0 | 0.98 | 0.6  | 0.37 | -0.5 |
| F1 | 03-12-2019 | 3059  | B | 0 | 1.72 | 0.9  | 0.88 | 0    |
| F1 | 03-12-2019 | 3087  | B | 0 | 1.71 | 1.01 | 0.73 | -0.3 |
| F1 | 03-12-2019 | 3123  | B | 0 | 0.94 | 0.46 | 0.34 | -0.3 |
| F1 | 03-12-2019 | 3117  | B | 0 | 1.11 | 1.04 | 0.93 | -0.1 |
| F1 | 03-12-2019 | 3020  | B | 0 | 0.54 | 0.23 | 0.12 | -    |
| F1 | 03-12-2019 | 3572  | B | 0 | 0.72 | 0.48 | 0.23 | -0.7 |
| F1 | 03-12-2019 | 3099  | B | 0 | 1.23 | 0.95 | 0.65 | -0.4 |
| F1 | 03-12-2019 | 3049  | B | 0 | 1.43 | 0.82 | 0.65 | -0.2 |
| F1 | 03-12-2019 | 2950  | B | 0 | 1.16 | 0.75 | 0.43 | -0.6 |
| F1 | 03-12-2019 | 3558  | B | 0 | 1.73 | 0.77 | 0.43 | -0.6 |
| F1 | 03-12-2019 | 2492  | B | 0 | 1.77 | 1.21 | 0.99 | -0.2 |
| F1 | 03-12-2019 | 1970  | B | 0 | 0.26 | 0.21 | 0.02 | -    |
| F1 | 03-12-2019 | 2576  | B | 0 | 1.43 | 0.72 | 0.52 | -0.3 |
| F1 | 03-12-2019 | 3617  | B | 0 | 1.45 | 0.76 | 0.67 | -0.1 |
| F1 | 03-12-2019 | 3016  | B | 0 | 0.81 | 0.81 | 0.74 | -0.1 |
| F1 | 03-12-2019 | 3032  | B | 0 | 1.51 | 1    | 0.76 | -0.3 |
| F1 | 03-12-2019 | 3131  | B | 0 | 1.26 | 0.52 | 0.35 | -0.4 |
| F1 | 03-12-2019 | 2564  | B | 0 | 0.81 | 0.51 | 0.3  | -0.5 |
| F1 | 03-12-2019 | 3142  | B | 0 | 0.75 | 0.62 | 0.19 | -1.2 |
| F1 | 03-12-2019 | 3544  | B | 0 | 0.29 | 0.11 | 0.11 | -    |
| F1 | 03-12-2019 | 3056  | B | 0 | 0.99 | 0.55 | 0.53 | 0    |
| F1 | 03-12-2019 | 2539  | B | 0 | 1.2  | 0.91 | 0.41 | -0.8 |
| F1 | 03-12-2019 | 3608  | B | 0 | 0.09 | 0.07 | 0.04 | -    |
| F1 | 03-12-2019 | 3446  | B | 0 | 1.49 | 1.11 | 0.79 | -0.3 |
| F1 | 03-12-2019 | 2530  | B | 0 | 0.64 | 0.52 | 0.28 | -0.6 |
| F1 | 03-12-2019 | 2354  | B | 0 | 1.07 | 0.86 | 0.44 | -0.7 |
| F1 | 03-12-2019 | 3560  | B | 0 | 0.24 | 0.16 | 0.08 | -    |
| F1 | 03-12-2019 | 2480  | B | 0 | 1.69 | 1.07 | 0.85 | -0.2 |

|    |            |      |   |   |      |      |      |      |
|----|------------|------|---|---|------|------|------|------|
| F1 | 03-12-2019 | 3057 | B | 0 | 2.01 | 1.17 | 0.94 | -0.2 |
| F1 | 03-12-2019 | 2542 | B | 0 | 1.4  | 0.99 | 0.56 | -0.6 |
| F1 | 03-12-2019 | 3063 | B | 0 | 1.74 | 1.12 | 0.59 | -0.6 |
| F1 | 03-12-2019 | 3046 | B | 0 | 0.3  | 0.33 | 0.14 | -0.8 |
| F1 | 03-12-2019 | 3581 | B | 0 | 0.29 | 0.21 | 0.15 | -    |
| F1 | 03-12-2019 | 3086 | B | 0 | 0.69 | 0.32 | 0.19 | -0.5 |
| F1 | 03-12-2019 | 2459 | B | 0 | 1.47 | 0.97 | 0.78 | -0.2 |
| F1 | 03-12-2019 | 3546 | B | 0 | 0.16 | 0.03 | 0.04 | -    |
| F1 | 03-12-2019 | 3019 | B | 0 | 0.92 | 0.64 | 0.35 | -0.6 |
| F1 | 03-12-2019 | 1943 | B | 0 | 0.68 | 0.69 | 0.41 | -0.5 |
| F1 | 03-12-2019 | 1975 | B | 0 | 1    | 0.68 | 0.35 | -0.7 |
| F1 | 03-12-2019 | 3961 | B | 0 | 1.37 | 0.8  | 0.59 | -0.3 |
| F1 | 03-12-2019 | 3025 | B | 0 | 1.63 | 0.93 | 0.54 | -0.5 |
| F1 | 03-12-2019 | 2485 | B | 0 | 0.29 | 0.33 | 0.15 | -0.8 |
| F1 | 03-12-2019 | 1957 | B | 0 | 0.81 | 0.6  | 0.51 | -0.2 |
| F1 | 03-12-2019 | 2440 | B | 0 | 2.29 | 0.91 | 0.95 | 0    |
| F1 | 03-12-2019 | 2051 | B | 0 | 1.52 | 0.95 | 0.71 | -0.3 |
| F1 | 03-12-2019 | 3074 | B | 0 | 0.9  | 0.59 | 0.25 | -0.9 |
| F1 | 03-12-2019 | 2960 | B | 0 | 0.34 | 0.04 | 0.15 | -    |
| F1 | 03-12-2019 | 3910 | B | 0 | 1.48 | 0.99 | 0.7  | -0.3 |
| F1 | 03-12-2019 | 2434 | B | 0 | 0.69 | 0.54 | 0.18 | -1.1 |
| F1 | 03-12-2019 | 1324 | B | 0 | 1.48 | 0.85 | 0.56 | -0.4 |
| F1 | 03-12-2019 | 2972 | B | 0 | 1.85 | 1.09 | 0.82 | -0.3 |
| F1 | 03-12-2019 | 1500 | B | 0 | 0.97 | 0.5  | 0.34 | -0.4 |
| F1 | 03-12-2019 | 2980 | B | 0 | 1.61 | 1.04 | 0.77 | -0.3 |
| F1 | 03-12-2019 | 1959 | B | 0 | 1.8  | 1.15 | 0.7  | -0.5 |
| F1 | 03-12-2019 | 2490 | B | 0 | 0.3  | 0.18 | 0.13 | -    |
| F1 | 03-12-2019 | 2489 | B | 0 | 1.97 | 1.18 | 0.65 | -0.6 |
| F1 | 03-12-2019 | 3958 | B | 0 | 0.39 | 0.19 | 0.07 | -    |
| F1 | 03-12-2019 | 2436 | B | 0 | 0.89 | 0.63 | 0.34 | -0.6 |
| F1 | 03-12-2019 | 2986 | B | 0 | 1.65 | 1.06 | 0.72 | -0.4 |
| F1 | 03-12-2019 | 3101 | B | 0 | 1.78 | 1.15 | 0.95 | -0.2 |
| F1 | 03-12-2019 | 2472 | B | 0 | 0.35 | 0.15 | 0.1  | -    |
| F1 | 03-12-2019 | 2007 | B | 0 | 1.96 | 1.24 | 1.15 | -0.1 |
| F1 | 03-12-2019 | 1954 | B | 0 | 1.5  | 0.93 | 0.65 | -0.4 |
| F1 | 03-12-2019 | 3964 | B | 0 | 1.51 | 1.16 | 0.95 | -0.2 |
| F1 | 03-12-2019 | 1484 | B | 0 | 1.03 | 0.7  | 0.35 | -0.7 |
| F1 | 03-12-2019 | 2449 | B | 0 | 0.5  | 0.21 | 0.14 | -    |
| F1 | 03-12-2019 | 2349 | B | 0 | 0.23 | 0.16 | 0.08 | -    |
| F1 | 03-12-2019 | 1475 | B | 0 | 0.92 | 0.56 | 0.41 | -0.3 |
| F1 | 03-12-2019 | 3072 | B | 0 | 0.71 | 0.64 | 0.34 | -0.6 |
| F1 | 03-12-2019 | 3955 | B | 0 | 0.99 | 0.51 | 0.45 | -0.1 |
| F1 | 03-12-2019 | 2426 | B | 0 | 0.38 | 0.28 | 0.1  | -1.1 |
| F1 | 03-12-2019 | 3957 | B | 0 | 1.13 | 0.79 | 0.53 | -0.4 |
| F1 | 03-12-2019 | 3953 | B | 0 | 2.35 | 1.5  | 1.46 | 0    |
| F1 | 03-12-2019 | 3023 | B | 0 | 0.32 | 0.14 | 0.09 | -    |
| F1 | 03-12-2019 | 2432 | B | 0 | 0.5  | 0.59 | 0.23 | -0.9 |
| F1 | 03-12-2019 | 2355 | B | 0 | 2.31 | 1.23 | 1.17 | 0    |
| F1 | 03-12-2019 | 2466 | B | 0 | 1.04 | 0.97 | 0.37 | -1   |
| F1 | 03-12-2019 | 3956 | B | 0 | 0.17 | 0.03 | 0.06 | -    |
| F1 | 03-12-2019 | 2381 | B | 0 | 1.21 | 0.75 | 0.54 | -0.3 |

|    |            |      |   |   |      |      |      |      |
|----|------------|------|---|---|------|------|------|------|
| F1 | 03-12-2019 | 3547 | B | 0 | 1.05 | 0.46 | 0.33 | -0.3 |
| F1 | 03-12-2019 | 3551 | B | 0 | 0.31 | 0.22 | 0.17 | -    |
| F1 | 03-12-2019 | 3013 | B | 0 | 1.34 | 0.89 | 0.49 | -0.6 |
| F1 | 03-12-2019 | 1151 | B | 0 | 1.5  | 1.08 | 0.61 | -0.6 |
| F1 | 03-12-2019 | 2973 | B | 0 | 0.91 | 0.44 | 0.32 | -0.3 |
| F1 | 03-12-2019 | 3549 | B | 0 | 0.45 | 0.27 | 0.18 | -0.4 |
| F1 | 03-12-2019 | 3954 | B | 0 | 0.21 | 0.17 | 0.09 | -    |
| F1 | 03-12-2019 | 3034 | B | 0 | 1.24 | 1.16 | 0.82 | -0.3 |
| F1 | 03-12-2019 | 1438 | B | 0 | 0.98 | 0.76 | 0.58 | -0.3 |
| F1 | 03-12-2019 | 3553 | B | 0 | 1    | 0.54 | 0.39 | -0.3 |
| F1 | 03-12-2019 | 1966 | B | 0 | 1.29 | 0.87 | 0.65 | -0.3 |
| F1 | 03-12-2019 | 2997 | B | 0 | 1.84 | 1.19 | 1.04 | -0.1 |
| F1 | 03-12-2019 | 3550 | B | 0 | 1.26 | 0.92 | 0.64 | -0.4 |
| F1 | 03-12-2019 | 3959 | B | 0 | 0.47 | 0.22 | 0.13 | -    |
| F2 | 03-12-2019 | 9013 | B | 0 | 0.89 | 0.52 | 0.38 | -0.3 |
| F2 | 03-12-2019 | 9011 | B | 0 | 1.02 | 0.56 | 0.49 | -0.1 |
| F2 | 03-12-2019 | 9012 | B | 0 | 1.43 | 0.98 | 0.88 | -0.1 |
| F2 | 03-12-2019 | 9020 | B | 0 | 0.4  | 0.17 | 0.15 | -    |
| F2 | 03-12-2019 | 9018 | B | 0 | 1.25 | 0.85 | 0.58 | -0.4 |
| F2 | 03-12-2019 | 9015 | B | 0 | 1.31 | 0.93 | 0.7  | -0.3 |
| F2 | 03-12-2019 | 9009 | B | 0 | 0.75 | 0.3  | 0.2  | -0.4 |
| F2 | 03-12-2019 | 9017 | B | 0 | 1.36 | 0.75 | 0.57 | -0.3 |
| F2 | 03-12-2019 | 9010 | B | 0 | 0.88 | 0.38 | 0.31 | -0.2 |
| F2 | 03-12-2019 | 9019 | B | 0 | 0.85 | 0.46 | 0.32 | -0.4 |
| F2 | 03-12-2019 | 9016 | B | 0 | 0.75 | 0.42 | 0.35 | -0.2 |
| F2 | 03-12-2019 | 9014 | B | 0 | 1.23 | 0.68 | 0.56 | -0.2 |
| F2 | 03-12-2019 | 6964 | B | 0 | 0.88 | 0.57 | 0.4  | -0.4 |
| F2 | 03-12-2019 | 6532 | B | 0 | 0.57 | 0.42 | 0.29 | -0.4 |
| F2 | 03-12-2019 | 6902 | B | 0 | 0.71 | 0.43 | 0.2  | -0.8 |
| F2 | 03-12-2019 | 7521 | B | 0 | 1.41 | 0.76 | 0.47 | -0.5 |
| F2 | 03-12-2019 | 7485 | B | 0 | 0.89 | 0.47 | 0.35 | -0.3 |
| F2 | 03-12-2019 | 7880 | B | 0 | 1.08 | 0.46 | 0.22 | -0.7 |
| F2 | 03-12-2019 | 7453 | B | 0 | 1.71 | 0.95 | 0.77 | -0.2 |
| F2 | 03-12-2019 | 7018 | B | 0 | 1.1  | 0.72 | 0.47 | -0.4 |
| F2 | 03-12-2019 | 7399 | B | 0 | 0.55 | 0.33 | 0.17 | -0.7 |
| F2 | 03-12-2019 | 7911 | B | 0 | 0.34 | 0.16 | 0.07 | -    |
| F2 | 03-12-2019 | 7901 | B | 0 | 0.49 | 0.25 | 0.17 | -0.4 |
| F2 | 03-12-2019 | 7886 | B | 0 | 0.35 | 0.34 | 0.18 | -0.6 |
| F2 | 03-12-2019 | 7423 | B | 0 | 1.56 | 1.01 | 0.6  | -0.5 |
| F2 | 03-12-2019 | 7425 | B | 0 | 1.42 | 0.96 | 0.58 | -0.5 |
| F2 | 03-12-2019 | 7732 | B | 0 | 0.14 | 0.04 | 0.01 | -    |
| F2 | 03-12-2019 | 6533 | B | 0 | 0.86 | 0.29 | 0.31 | 0.1  |
| F2 | 03-12-2019 | 7456 | B | 0 | 0.42 | 0.19 | 0.12 | -    |
| F2 | 03-12-2019 | 7885 | B | 0 | 1.69 | 0.95 | 0.81 | -0.2 |
| F2 | 03-12-2019 | 8485 | B | 0 | 1.49 | 0.8  | 0.61 | -0.3 |
| F2 | 03-12-2019 | 7424 | B | 0 | 2.05 | 1.26 | 0.88 | -0.4 |
| F2 | 03-12-2019 | 7361 | B | 0 | 1.3  | 0.9  | 0.82 | -0.1 |
| F2 | 03-12-2019 | 7844 | B | 0 | 0.62 | 0.35 | 0.23 | -0.4 |
| F2 | 03-12-2019 | 6945 | B | 0 | 0.37 | 0.19 | 0.11 | -    |
| F2 | 03-12-2019 | 7920 | B | 0 | 1.2  | 0.92 | 0.62 | -0.4 |
| F2 | 03-12-2019 | 7883 | B | 0 | 1.97 | 1.47 | 1.35 | -0.1 |

|    |            |      |   |   |      |      |      |      |
|----|------------|------|---|---|------|------|------|------|
| F2 | 03-12-2019 | 6257 | B | 0 | 0.98 | 0.64 | 0.5  | -0.2 |
| F2 | 03-12-2019 | 6962 | B | 0 | 0.91 | 0.51 | 0.2  | -0.9 |
| F2 | 03-12-2019 | 7388 | B | 0 | 1.68 | 1.2  | 0.97 | -0.2 |
| F2 | 03-12-2019 | 6983 | B | 0 | 1.5  | 0.39 | 0.25 | -0.4 |
| F2 | 03-12-2019 | 6931 | B | 0 | 0.55 | 0.32 | 0.12 | -1   |
| F2 | 03-12-2019 | 7503 | B | 0 | 0.37 | 0.16 | 0.11 | -    |
| F2 | 03-12-2019 | 7887 | B | 0 | 0.69 | 0.15 | 0.09 | -    |
| F2 | 03-12-2019 | 6924 | B | 0 | 1.06 | 0.74 | 0.5  | -0.4 |
| F2 | 03-12-2019 | 6892 | B | 0 | 1.97 | 1.21 | 0.96 | -0.2 |
| F2 | 03-12-2019 | 7513 | B | 0 | 1.86 | 1.26 | 1.14 | -0.1 |
| F2 | 03-12-2019 | 7409 | B | 0 | 1.57 | 1.09 | 0.82 | -0.3 |
| F2 | 03-12-2019 | 7982 | B | 0 | 0.89 | 0.34 | 0.23 | -0.4 |
| F2 | 03-12-2019 | 7413 | B | 0 | 0.82 | 0.6  | 0.28 | -0.7 |
| F2 | 03-12-2019 | 7909 | B | 0 | 1.04 | 0.54 | 0.3  | -0.6 |
| F2 | 03-12-2019 | 7450 | B | 0 | 1.32 | 0.83 | 0.67 | -0.2 |
| F2 | 03-12-2019 | 8501 | B | 0 | 1.62 | 1.07 | 0.93 | -0.1 |
| F2 | 03-12-2019 | 8516 | B | 0 | 0.93 | 0.69 | 0.42 | -0.5 |
| F2 | 03-12-2019 | 7861 | B | 0 | 1.49 | 0.84 | 0.5  | -0.5 |
| F2 | 03-12-2019 | 8467 | B | 0 | 0.25 | 0.07 | 0.11 | -    |
| F2 | 03-12-2019 | 7951 | B | 0 | 1.21 | 0.34 | 0.14 | -0.9 |
| F2 | 03-12-2019 | 8490 | B | 0 | 1.79 | 0.84 | 0.54 | -0.4 |
| F2 | 03-12-2019 | 8498 | B | 0 | 1.2  | 0.43 | 0.29 | -0.4 |
| F2 | 03-12-2019 | 8574 | B | 0 | 1.06 | 0.69 | 0.17 | -1.4 |
| F2 | 03-12-2019 | 7831 | B | 0 | 1    | 0.47 | 0.4  | -0.2 |
| F2 | 03-12-2019 | 7858 | B | 0 | 1.24 | 0.8  | 0.37 | -0.8 |
| F2 | 03-12-2019 | 8513 | B | 0 | 0.55 | 0.28 | 0.22 | -0.3 |
| F2 | 03-12-2019 | 8439 | B | 0 | 1.2  | 0.7  | 0.4  | -0.6 |
| F2 | 03-12-2019 | 7912 | B | 0 | 1.47 | 1.09 | 0.79 | -0.3 |
| F2 | 03-12-2019 | 7819 | B | 0 | 1.04 | 0.47 | 0.38 | -0.2 |
| F2 | 03-12-2019 | 8434 | B | 0 | 0.97 | 0.36 | 0.32 | -0.1 |
| F2 | 03-12-2019 | 8483 | B | 0 | 1.17 | 0.7  | 0.38 | -0.6 |
| F2 | 03-12-2019 | 8423 | B | 0 | 0.53 | 0.26 | 0.07 | -1.3 |
| F2 | 03-12-2019 | 8507 | B | 0 | 1.45 | 0.87 | 0.6  | -0.4 |
| F2 | 03-12-2019 | 8430 | B | 0 | 1.42 | 0.71 | 0.48 | -0.4 |
| F2 | 03-12-2019 | 6916 | B | 0 | 1.86 | 1.12 | 1.07 | 0    |
| F2 | 03-12-2019 | 7868 | B | 0 | 1.79 | 0.86 | 0.15 | -1.8 |
| F2 | 03-12-2019 | 7888 | B | 0 | 1.31 | 0.68 | 0.56 | -0.2 |
| F2 | 03-12-2019 | 8450 | B | 0 | 1.23 | 0.59 | 0.53 | -0.1 |
| F2 | 03-12-2019 | 7846 | B | 0 | 1.58 | 1.17 | 1.03 | -0.1 |
| F2 | 03-12-2019 | 7345 | B | 0 | 1.09 | 0.6  | 0.28 | -0.8 |
| F2 | 03-12-2019 | 7408 | B | 0 | 0.96 | 0.37 | 0.26 | -0.3 |
| F2 | 03-12-2019 | 7877 | B | 0 | 1.55 | 0.8  | 0.55 | -0.4 |
| F2 | 03-12-2019 | 7894 | B | 0 | 0.42 | 0.66 | 0.21 | -1.1 |
| F2 | 03-12-2019 | 7904 | B | 0 | 0.38 | 0.33 | 0.15 | -0.8 |
| F2 | 03-12-2019 | 7827 | B | 0 | 0.21 | 0.09 | 0.04 | -    |
| F2 | 03-12-2019 | 7931 | B | 0 | 2.4  | 1.37 | 1.24 | -0.1 |
| F2 | 03-12-2019 | 6918 | B | 0 | 1.33 | 1.03 | 0.71 | -0.4 |
| F2 | 03-12-2019 | 7836 | B | 0 | 1.48 | 1    | 0.75 | -0.3 |
| F2 | 03-12-2019 | 8503 | B | 0 | 0.92 | 0.47 | 0.29 | -0.5 |
| F2 | 03-12-2019 | 7825 | B | 0 | 1.54 | 0.82 | 0.61 | -0.3 |
| F2 | 03-12-2019 | 8461 | B | 0 | 0.57 | 0.49 | 0.3  | -0.5 |

|    |            |      |   |   |      |      |      |      |
|----|------------|------|---|---|------|------|------|------|
| F2 | 03-12-2019 | 7443 | B | 0 | 1.11 | 0.87 | 0.49 | -0.6 |
| F2 | 03-12-2019 | 7404 | B | 0 | 0.6  | 0.48 | 0.28 | -0.5 |
| F2 | 03-12-2019 | 8419 | B | 0 | 0.63 | 0.33 | 0.15 | -0.8 |
| F2 | 03-12-2019 | 7873 | B | 0 | 0.86 | 0.48 | 0.41 | -0.1 |
| F2 | 03-12-2019 | 7403 | B | 0 | 0.77 | 0.33 | 0.08 | -1.4 |
| F2 | 03-12-2019 | 7853 | B | 0 | 1.99 | 1.21 | 0.8  | -0.4 |
| F2 | 03-12-2019 | 7770 | B | 0 | 1.45 | 0.89 | 0.6  | -0.4 |
| F2 | 03-12-2019 | 7740 | B | 0 | 0.05 | 0.07 | 0.07 | -    |
| F2 | 03-12-2019 | 8412 | B | 0 | 0.79 | 0.26 | 0.19 | -0.3 |
| F2 | 03-12-2019 | 7899 | B | 0 | 0.79 | 0.62 | 0.4  | -0.4 |
| F2 | 03-12-2019 | 7856 | B | 0 | 1.24 | 0.87 | 0.59 | -0.4 |
| F2 | 03-12-2019 | 7448 | B | 0 | 0.6  | 0.48 | 0.2  | -0.9 |
| F2 | 03-12-2019 | 8489 | B | 0 | 0.74 | 0.45 | 0.31 | -0.4 |
| F2 | 03-12-2019 | 8592 | B | 0 | 1.14 | 0.82 | 0.31 | -1   |
| F2 | 03-12-2019 | 8982 | B | 0 | 1.17 | 0.67 | 0.6  | -0.1 |
| F2 | 03-12-2019 | 8981 | B | 0 | 1.35 | 0.64 | 0.49 | -0.3 |
| F2 | 03-12-2019 | 8978 | B | 0 | 1.76 | 1.01 | 0.97 | 0    |
| F2 | 03-12-2019 | 8983 | B | 0 | 1.75 | 1.01 | 0.86 | -0.2 |
| F2 | 03-12-2019 | 8979 | B | 0 | 0.57 | 0.32 | 0.22 | -0.4 |
| F2 | 03-12-2019 | 8977 | B | 0 | 1.98 | 1.28 | 1.27 | 0    |
| F2 | 03-12-2019 | 8973 | B | 0 | 1.47 | 0.69 | 0.59 | -0.1 |
| F2 | 03-12-2019 | 8968 | B | 0 | 0.92 | 0.7  | 0.59 | -0.2 |
| F2 | 03-12-2019 | 8970 | B | 0 | 1.2  | 0.81 | 0.5  | -0.5 |
| F2 | 03-12-2019 | 8975 | B | 0 | 1.2  | 0.49 | 0.47 | 0    |
| F2 | 03-12-2019 | 8976 | B | 0 | 2.05 | 1.25 | 1.15 | -0.1 |
| F2 | 03-12-2019 | 8971 | B | 0 | 0.78 | 0.51 | 0.23 | -0.8 |
| F2 | 03-12-2019 | 8974 | B | 0 | 0.44 | 0.27 | 0.23 | -0.2 |
| F2 | 03-12-2019 | 8966 | B | 0 | 1.18 | 0.71 | 0.53 | -0.3 |
| F2 | 03-12-2019 | 8967 | B | 0 | 1.21 | 0.64 | 0.45 | -0.4 |
| F2 | 03-12-2019 | 8969 | B | 0 | 0.44 | 0.07 | 0.19 | -    |
| F2 | 03-12-2019 | 8972 | B | 0 | 1.57 | 0.77 | 0.6  | -0.2 |
| F2 | 03-12-2019 | 8921 | B | 0 | 0.99 | 0.36 | 0.45 | 0.2  |
| F1 | 19-12-2019 | 3602 | B | 0 | 1.44 | 0.99 | 0.65 | -0.4 |
| F1 | 19-12-2019 | 3989 | B | 0 | 0.75 | 0.18 | 0.22 | -    |
| F1 | 19-12-2019 | 3990 | B | 0 | 1.97 | 1.04 | 0.93 | -0.1 |
| F1 | 19-12-2019 | 3991 | B | 0 | 1.39 | 0.67 | 0.57 | -0.2 |
| F1 | 19-12-2019 | 3992 | B | 0 | 1.95 | 0.81 | 0.99 | 0.2  |
| F1 | 19-12-2019 | 3993 | B | 0 | 1.51 | 0.86 | 0.76 | -0.1 |
| F1 | 19-12-2019 | 3994 | B | 0 | 1.52 | 0.87 | 0.75 | -0.1 |
| F1 | 19-12-2019 | 3995 | B | 0 | 1.93 | 1    | 0.88 | -0.1 |
| F1 | 19-12-2019 | 3996 | B | 0 | 1.36 | 0.88 | 0.59 | -0.4 |
| F1 | 19-12-2019 | 3997 | B | 0 | 1.43 | 0.82 | 0.71 | -0.1 |
| F1 | 19-12-2019 | 3999 | B | 0 | 1.84 | 0.84 | 1.09 | 0.3  |
| F1 | 19-12-2019 | 4000 | B | 0 | 1.18 | 0.79 | 0.67 | -0.2 |
| F1 | 19-12-2019 | 1984 | B | 0 | 0.76 | 0.64 | 0.41 | -0.5 |
| F1 | 19-12-2019 | 1478 | B | 0 | 2.21 | 1.31 | 1.12 | -0.2 |
| F1 | 19-12-2019 | 1885 | B | 0 | 2.53 | 1.25 | 1.14 | -0.1 |
| F1 | 19-12-2019 | 1207 | B | 0 | 2.07 | 1.1  | 1    | -0.1 |
| F1 | 19-12-2019 | 2076 | B | 0 | 1.02 | 0.9  | 0.6  | -0.4 |
| F1 | 19-12-2019 | 2050 | B | 0 | 2.1  | 1.24 | 1.07 | -0.1 |
| F1 | 19-12-2019 | 1996 | B | 0 | 0.86 | 0.77 | 0.58 | -0.3 |

|    |            |       |   |   |      |      |      |      |
|----|------------|-------|---|---|------|------|------|------|
| F1 | 19-12-2019 | 1566  | B | 0 | 1.55 | 0.89 | 0.81 | -0.1 |
| F1 | 19-12-2019 | 10196 | B | 0 | 1.91 | 1.1  | 1.04 | 0    |
| F1 | 19-12-2019 | 2011  | B | 0 | 1.81 | 1.19 | 1.09 | -0.1 |
| F1 | 19-12-2019 | 2504  | B | 0 | 2.26 | 1.19 | 1.02 | -0.1 |
| F1 | 19-12-2019 | 2484  | B | 0 | 0.82 | 0.67 | 0.54 | -0.2 |
| F1 | 19-12-2019 | 2441  | B | 0 | 0.98 | 0.67 | 0.43 | -0.4 |
| F1 | 19-12-2019 | 2461  | B | 0 | 2.73 | 1.16 | 1.18 | 0    |
| F1 | 19-12-2019 | 3006  | B | 0 | 1.58 | 1.21 | 0.96 | -0.2 |
| F1 | 19-12-2019 | 3059  | B | 0 | 1.73 | 1.04 | 0.92 | -0.1 |
| F1 | 19-12-2019 | 3087  | B | 0 | 1.69 | 1.13 | 0.73 | -0.4 |
| F1 | 19-12-2019 | 3123  | B | 0 | 0.78 | 0.47 | 0.32 | -0.4 |
| F1 | 19-12-2019 | 3117  | B | 0 | 2.09 | 1.16 | 1.1  | -0.1 |
| F1 | 19-12-2019 | 3020  | B | 0 | 2.08 | 1.19 | 0.94 | -0.2 |
| F1 | 19-12-2019 | 3572  | B | 0 | 1.21 | 1    | 0.54 | -0.6 |
| F1 | 19-12-2019 | 3099  | B | 0 | 2.66 | 1.14 | 1.15 | 0    |
| F1 | 19-12-2019 | 3049  | B | 0 | 0.87 | 0.74 | 0.58 | -0.2 |
| F1 | 19-12-2019 | 2950  | B | 0 | 2.1  | 0.93 | 0.89 | 0    |
| F1 | 19-12-2019 | 3558  | B | 0 | 2.1  | 1.21 | 0.77 | -0.5 |
| F1 | 19-12-2019 | 2492  | B | 0 | 1.54 | 1.05 | 0.8  | -0.3 |
| F1 | 19-12-2019 | 1970  | B | 0 | 0.42 | 0.35 | 0.02 | -2.8 |
| F1 | 19-12-2019 | 2576  | B | 0 | 1.74 | 1.01 | 0.83 | -0.2 |
| F1 | 19-12-2019 | 3617  | B | 0 | 1.47 | 0.94 | 0.82 | -0.1 |
| F1 | 19-12-2019 | 3016  | B | 0 | 1.41 | 1.09 | 0.9  | -0.2 |
| F1 | 19-12-2019 | 3032  | B | 0 | 2.1  | 1.18 | 1.18 | 0    |
| F1 | 19-12-2019 | 3131  | B | 0 | 1.97 | 1.12 | 0.99 | -0.1 |
| F1 | 19-12-2019 | 2564  | B | 0 | 0.66 | 0.58 | 0.32 | -0.6 |
| F1 | 19-12-2019 | 3142  | B | 0 | 1.3  | 0.96 | 0.53 | -0.6 |
| F1 | 19-12-2019 | 3544  | B | 0 | 0.25 | 0.14 | 0.11 | -    |
| F1 | 19-12-2019 | 3056  | B | 0 | 1.92 | 1.13 | 1.07 | -0.1 |
| F1 | 19-12-2019 | 2539  | B | 0 | 2.48 | 1.26 | 1.2  | -0.1 |
| F1 | 19-12-2019 | 3608  | B | 0 | 0.33 | 0.38 | 0.23 | -0.5 |
| F1 | 19-12-2019 | 3446  | B | 0 | 1.67 | 1.17 | 1.01 | -0.1 |
| F1 | 19-12-2019 | 2530  | B | 0 | 1.71 | 1.32 | 1.14 | -0.1 |
| F1 | 19-12-2019 | 2354  | B | 0 | 1.25 | 1.05 | 0.65 | -0.5 |
| F1 | 19-12-2019 | 3560  | B | 0 | 0.22 | 0.18 | 0.09 | -    |
| F1 | 19-12-2019 | 2480  | B | 0 | 1.97 | 1.25 | 1.11 | -0.1 |
| F1 | 19-12-2019 | 3057  | B | 0 | 2.51 | 1.17 | 1.17 | 0    |
| F1 | 19-12-2019 | 2542  | B | 0 | 1.32 | 1.06 | 0.69 | -0.4 |
| F1 | 19-12-2019 | 3063  | B | 0 | 2.45 | 1.19 | 1.24 | 0    |
| F1 | 19-12-2019 | 3046  | B | 0 | 0.88 | 0.88 | 0.5  | -0.6 |
| F1 | 19-12-2019 | 3581  | B | 0 | 1.17 | 0.96 | 0.74 | -0.3 |
| F1 | 19-12-2019 | 3086  | B | 0 | 2.17 | 1.14 | 1.06 | -0.1 |
| F1 | 19-12-2019 | 2459  | B | 0 | 1.76 | 1.12 | 1.05 | -0.1 |
| F1 | 19-12-2019 | 3546  | B | 0 | 0.44 | 0.15 | 0.14 | -    |
| F1 | 19-12-2019 | 3019  | B | 0 | 1.6  | 0    | 0    | NA   |
| F1 | 19-12-2019 | 1943  | B | 0 | 0.82 | 1.04 | 0.74 | -0.3 |
| F1 | 19-12-2019 | 1975  | B | 0 | 1.5  | 0.92 | 0.49 | -0.6 |
| F1 | 19-12-2019 | 3961  | B | 0 | 1.66 | 1.05 | 0.91 | -0.1 |
| F1 | 19-12-2019 | 3025  | B | 0 | 1.55 | 0.85 | 0.61 | -0.3 |
| F1 | 19-12-2019 | 2485  | B | 0 | 0.74 | 0.72 | 0.36 | -0.7 |
| F1 | 19-12-2019 | 1957  | B | 0 | 0.92 | 0.9  | 0.83 | -0.1 |

|    |            |      |   |   |      |      |      |      |
|----|------------|------|---|---|------|------|------|------|
| F1 | 19-12-2019 | 2440 | B | 0 | 2.44 | 0.78 | 0.91 | 0.1  |
| F1 | 19-12-2019 | 2051 | B | 0 | 1.85 | 1.18 | 1.01 | -0.2 |
| F1 | 19-12-2019 | 3074 | B | 0 | 1    | 0.78 | 0.4  | -0.7 |
| F1 | 19-12-2019 | 2960 | B | 0 | 2.32 | 1.11 | 1.1  | 0    |
| F1 | 19-12-2019 | 3910 | B | 0 | 1.42 | 1.18 | 0.9  | -0.3 |
| F1 | 19-12-2019 | 2434 | B | 0 | 1.5  | 0.91 | 0.43 | -0.8 |
| F1 | 19-12-2019 | 1324 | B | 0 | 1.4  | 1.04 | 0.73 | -0.4 |
| F1 | 19-12-2019 | 2972 | B | 0 | 2.18 | 0.54 | 0.5  | -0.1 |
| F1 | 19-12-2019 | 1500 | B | 0 | 1.21 | 0.81 | 0.62 | -0.3 |
| F1 | 19-12-2019 | 2980 | B | 0 | 2.2  | 1.25 | 1.14 | -0.1 |
| F1 | 19-12-2019 | 1959 | B | 0 | 2.44 | 1.26 | 1.02 | -0.2 |
| F1 | 19-12-2019 | 2490 | B | 0 | 0.63 | 0.58 | 0.31 | -0.6 |
| F1 | 19-12-2019 | 2489 | B | 0 | 2.05 | 1.13 | 0.79 | -0.4 |
| F1 | 19-12-2019 | 3958 | B | 0 | 0.71 | 0.44 | 0.15 | -1.1 |
| F1 | 19-12-2019 | 2436 | B | 0 | 1.64 | 1.09 | 0.85 | -0.2 |
| F1 | 19-12-2019 | 2986 | B | 0 | 1.86 | 1.06 | 0.8  | -0.3 |
| F1 | 19-12-2019 | 3101 | B | 0 | 2.06 | 0.92 | 0.86 | -0.1 |
| F1 | 19-12-2019 | 2472 | B | 0 | 1.19 | 0.59 | 0.37 | -0.5 |
| F1 | 19-12-2019 | 2007 | B | 0 | 2.76 | 1.26 | 1.3  | 0    |
| F1 | 19-12-2019 | 1954 | B | 0 | 2.16 | 0    | 0    | NA   |
| F1 | 19-12-2019 | 3964 | B | 0 | 1.85 | 1.04 | 1.04 | 0    |
| F1 | 19-12-2019 | 1484 | B | 0 | 1.44 | 0.99 | 0.62 | -0.5 |
| F1 | 19-12-2019 | 2449 | B | 0 | 1.63 | 0.85 | 0.65 | -0.3 |
| F1 | 19-12-2019 | 2349 | B | 0 | 0.27 | 0.19 | 0.1  | -    |
| F1 | 19-12-2019 | 1475 | B | 0 | 1.03 | 0.66 | 0.49 | -0.3 |
| F1 | 19-12-2019 | 3072 | B | 0 | 1.13 | 0.74 | 0.41 | -0.6 |
| F1 | 19-12-2019 | 3955 | B | 0 | 1.58 | 0.83 | 0.57 | -0.4 |
| F1 | 19-12-2019 | 2426 | B | 0 | 1.1  | 0.73 | 0.31 | -0.9 |
| F1 | 19-12-2019 | 3957 | B | 0 | 1.34 | 0.91 | 0.62 | -0.4 |
| F1 | 19-12-2019 | 3953 | B | 0 | 2.52 | 1.43 | 1.35 | -0.1 |
| F1 | 19-12-2019 | 3023 | B | 0 | 0.56 | 0.49 | 0.3  | -0.5 |
| F1 | 19-12-2019 | 2432 | B | 0 | 0.71 | 0.73 | 0.35 | -0.7 |
| F1 | 19-12-2019 | 2355 | B | 0 | 2.68 | 1.29 | 1.22 | -0.1 |
| F1 | 19-12-2019 | 2466 | B | 0 | 1    | 0    | 0    | NA   |
| F1 | 19-12-2019 | 3956 | B | 0 | 1.74 | 1.28 | 1.02 | -0.2 |
| F1 | 19-12-2019 | 2381 | B | 0 | 1.92 | 0    | 0    | NA   |
| F1 | 19-12-2019 | 3547 | B | 0 | 0.97 | 0.63 | 0.39 | -0.5 |
| F1 | 19-12-2019 | 3551 | B | 0 | 1.24 | 0.95 | 0.45 | -0.7 |
| F1 | 19-12-2019 | 3013 | B | 0 | 1.92 | 1.27 | 0.92 | -0.3 |
| F1 | 19-12-2019 | 1151 | B | 0 | 2.1  | 1.26 | 0.96 | -0.3 |
| F1 | 19-12-2019 | 2973 | B | 0 | 1.09 | 0.56 | 0.36 | -0.4 |
| F1 | 19-12-2019 | 3549 | B | 0 | 1    | 0    | 0    | NA   |
| F1 | 19-12-2019 | 3954 | B | 0 | 2.22 | 1.13 | 1.01 | -0.1 |
| F1 | 19-12-2019 | 3034 | B | 0 | 2.12 | 1.29 | 1.14 | -0.1 |
| F1 | 19-12-2019 | 1438 | B | 0 | 1.44 | 1.11 | 0.92 | -0.2 |
| F1 | 19-12-2019 | 3553 | B | 0 | 1.01 | 0.75 | 0.48 | -0.4 |
| F1 | 19-12-2019 | 1966 | B | 0 | 1.89 | 1.08 | 0.92 | -0.2 |
| F1 | 19-12-2019 | 2997 | B | 0 | 2.32 | 1.29 | 1.18 | -0.1 |
| F1 | 19-12-2019 | 3550 | B | 0 | 1.59 | 1.12 | 0.9  | -0.2 |
| F1 | 19-12-2019 | 3959 | B | 0 | 2.06 | 1.29 | 1.07 | -0.2 |
| F2 | 19-12-2019 | 9013 | B | 0 | 1.57 | 0.99 | 0.72 | -0.3 |



|    |            |      |   |   |      |      |      |      |
|----|------------|------|---|---|------|------|------|------|
| F2 | 19-12-2019 | 9011 | B | 0 | 1.99 | 1.18 | 0.83 | -0.3 |
| F2 | 19-12-2019 | 9012 | B | 0 | 2.66 | 1.21 | 1.15 | -0.1 |
| F2 | 19-12-2019 | 9020 | B | 0 | 0.31 | 0.13 | 0.09 | -    |
| F2 | 19-12-2019 | 9018 | B | 0 | 1.49 | 1.08 | 0.9  | -0.2 |
| F2 | 19-12-2019 | 9015 | B | 0 | 1.28 | 0.83 | 0.58 | -0.4 |
| F2 | 19-12-2019 | 9009 | B | 0 | 1.86 | 1.09 | 0.77 | -0.4 |
| F2 | 19-12-2019 | 9017 | B | 0 | 1.31 | 1.01 | 0.74 | -0.3 |
| F2 | 19-12-2019 | 9010 | B | 0 | 1.1  | 0.49 | 0.35 | -0.4 |
| F2 | 19-12-2019 | 9019 | B | 0 | 1.33 | 0.74 | 0.5  | -0.4 |
| F2 | 19-12-2019 | 9016 | B | 0 | 0.67 | 0.37 | 0.25 | -0.4 |
| F2 | 19-12-2019 | 9014 | B | 0 | 1.33 | 0.79 | 0.59 | -0.3 |
| F2 | 19-12-2019 | 6964 | B | 0 | 2.72 | 0.99 | 0.93 | -0.1 |
| F2 | 19-12-2019 | 6532 | B | 0 | 0.53 | 0.39 | 0.25 | -0.4 |
| F2 | 19-12-2019 | 6902 | B | 0 | 1.8  | 0.85 | 0.6  | -0.4 |
| F2 | 19-12-2019 | 7521 | B | 0 | 2.58 | 1.25 | 1.15 | -0.1 |
| F2 | 19-12-2019 | 7485 | B | 0 | 0.8  | 0.39 | 0.27 | -0.4 |
| F2 | 19-12-2019 | 7880 | B | 0 | 1.96 | 1.25 | 0.99 | -0.2 |
| F2 | 19-12-2019 | 7453 | B | 0 | 2.73 | 1.14 | 1.12 | 0    |
| F2 | 19-12-2019 | 7018 | B | 0 | 2.35 | 1.17 | 1.07 | -0.1 |
| F2 | 19-12-2019 | 7399 | B | 0 | 0.7  | 0.46 | 0.23 | -0.7 |
| F2 | 19-12-2019 | 7911 | B | 0 | 1.3  | 0.79 | 0.48 | -0.5 |
| F2 | 19-12-2019 | 7901 | B | 0 | 0.64 | 0.39 | 0.27 | -0.4 |
| F2 | 19-12-2019 | 7886 | B | 0 | 1.28 | 0.94 | 0.69 | -0.3 |
| F2 | 19-12-2019 | 7423 | B | 0 | 1.75 | 1.12 | 0.63 | -0.6 |
| F2 | 19-12-2019 | 7425 | B | 0 | 1.88 | 1.14 | 0.67 | -0.5 |
| F2 | 19-12-2019 | 7732 | B | 0 | 0.75 | 0.41 | 0.16 | -0.9 |
| F2 | 19-12-2019 | 6533 | B | 0 | 1.54 | 0.8  | 0.63 | -0.2 |
| F2 | 19-12-2019 | 7456 | B | 0 | 1.13 | 0.7  | 0.5  | -0.3 |
| F2 | 19-12-2019 | 7885 | B | 0 | 2.56 | 1.03 | 0.99 | 0    |
| F2 | 19-12-2019 | 8485 | B | 0 | 2.94 | 1.27 | 1.23 | 0    |
| F2 | 19-12-2019 | 7424 | B | 0 | 2.61 | 1.21 | 1.15 | -0.1 |
| F2 | 19-12-2019 | 7361 | B | 0 | 2.47 | 1.32 | 1.28 | 0    |
| F2 | 19-12-2019 | 7844 | B | 0 | 2.08 | 1.3  | 1.1  | -0.2 |
| F2 | 19-12-2019 | 6945 | B | 0 | 0.94 | 0.7  | 0.43 | -0.5 |
| F2 | 19-12-2019 | 7920 | B | 0 | 1.52 | 0.84 | 0.5  | -0.5 |
| F2 | 19-12-2019 | 7883 | B | 0 | 2.61 | 1.52 | 1.44 | -0.1 |
| F2 | 19-12-2019 | 6257 | B | 0 | 1.53 | 1.06 | 0.86 | -0.2 |
| F2 | 19-12-2019 | 6962 | B | 0 | 2.24 | 1.14 | 0.98 | -0.1 |
| F2 | 19-12-2019 | 7388 | B | 0 | 2.42 | 1.21 | 1.16 | 0    |
| F2 | 19-12-2019 | 6983 | B | 0 | 2.3  | 1.12 | 0.83 | -0.3 |
| F2 | 19-12-2019 | 6931 | B | 0 | 1.49 | 1.01 | 0.58 | -0.6 |
| F2 | 19-12-2019 | 7503 | B | 0 | 0.64 | 0.4  | 0.26 | -0.4 |
| F2 | 19-12-2019 | 7887 | B | 0 | 2.3  | 1.11 | 0.9  | -0.2 |
| F2 | 19-12-2019 | 6924 | B | 0 | 2.08 | 1.16 | 0.89 | -0.3 |
| F2 | 19-12-2019 | 6892 | B | 0 | 2.51 | 1.22 | 1.18 | 0    |
| F2 | 19-12-2019 | 7513 | B | 0 | 2.53 | 1.34 | 1.29 | 0    |
| F2 | 19-12-2019 | 7409 | B | 0 | 0.93 | 0.63 | 0.34 | -0.6 |
| F2 | 19-12-2019 | 7982 | B | 0 | 2.23 | 1.09 | 0.83 | -0.3 |
| F2 | 19-12-2019 | 7413 | B | 0 | 1.15 | 0.78 | 0.42 | -0.6 |
| F2 | 19-12-2019 | 7909 | B | 0 | 2.38 | 1.29 | 0.94 | -0.3 |
| F2 | 19-12-2019 | 7450 | B | 0 | 2.39 | 1.29 | 1.17 | -0.1 |

|    |            |      |   |   |      |      |      |       |
|----|------------|------|---|---|------|------|------|-------|
| F2 | 19-12-2019 | 8501 | B | 0 | 1.61 | 1.07 | 0.85 | -0.2  |
| F2 | 19-12-2019 | 8516 | B | 0 | 1.12 | 0.63 | 0.43 | -0.4  |
| F2 | 19-12-2019 | 7861 | B | 0 | 2.7  | 1.39 | 1.32 | -0.1  |
| F2 | 19-12-2019 | 8467 | B | 0 | 0.56 | 0.5  | 0.26 | -0.6  |
| F2 | 19-12-2019 | 7951 | B | 0 | 1.72 | 0.8  | 0.38 | -0.7  |
| F2 | 19-12-2019 | 8490 | B | 0 | 2.3  | 1.32 | 1.09 | -0.2  |
| F2 | 19-12-2019 | 8498 | B | 0 | 2    | 1.17 | 0.93 | -0.2  |
| F2 | 19-12-2019 | 8574 | B | 0 | 2.26 | 1.37 | 0.76 | -0.6  |
| F2 | 19-12-2019 | 7831 | B | 0 | 1.7  | 0.96 | 0.77 | -0.2  |
| F2 | 19-12-2019 | 7858 | B | 0 | 1.72 | 1.03 | 0.54 | -0.7  |
| F2 | 19-12-2019 | 8513 | B | 0 | 1.89 | 1.17 | 1.01 | -0.2  |
| F2 | 19-12-2019 | 8439 | B | 0 | 1.45 | 1.06 | 0.66 | -0.5  |
| F2 | 19-12-2019 | 7912 | B | 0 | 2.24 | 1.39 | 1.23 | -0.1  |
| F2 | 19-12-2019 | 7819 | B | 0 | 1.55 | 1.08 | 0.87 | -0.2  |
| F2 | 19-12-2019 | 8434 | B | 0 | 1.8  | 0.95 | 0.82 | -0.1  |
| F2 | 19-12-2019 | 8483 | B | 0 | 1.47 | 0.99 | 0.55 | -0.6  |
| F2 | 19-12-2019 | 8423 | B | 0 | 1.55 | 1.02 | 0.52 | -0.7  |
| F2 | 19-12-2019 | 8507 | B | 0 | 2.05 | 1.1  | 0.93 | -0.21 |
| F2 | 19-12-2019 | 8430 | B | 0 | 2.07 | 1.07 | 0.93 | -0.1  |
| F2 | 19-12-2019 | 6916 | B | 0 | 2.31 | 1.02 | 1.03 | 0     |
| F2 | 19-12-2019 | 7868 | B | 0 | 2.1  | 1.2  | 0.52 | -0.8  |
| F2 | 19-12-2019 | 7888 | B | 0 | 2    | 1.01 | 0.95 | -0.1  |
| F2 | 19-12-2019 | 8450 | B | 0 | 2.23 | 1.03 | 1.02 | 0     |
| F2 | 19-12-2019 | 7846 | B | 0 | 2.18 | 1.19 | 0.93 | -0.2  |
| F2 | 19-12-2019 | 7345 | B | 0 | 1.19 | 0.91 | 0.41 | -0.8  |
| F2 | 19-12-2019 | 7408 | B | 0 | 1.51 | 1.06 | 0.78 | -0.3  |
| F2 | 19-12-2019 | 7877 | B | 0 | 2.14 | 1.2  | 1.08 | -0.1  |
| F2 | 19-12-2019 | 7894 | B | 0 | 0.55 | 0.57 | 0.23 | -0.9  |
| F2 | 19-12-2019 | 7904 | B | 0 | 2.44 | 1.19 | 1.08 | -0.1  |
| F2 | 19-12-2019 | 7827 | B | 0 | 0.68 | 0.44 | 0.24 | -0.6  |
| F2 | 19-12-2019 | 7931 | B | 0 | 2.69 | 1.35 | 1.25 | -0.1  |
| F2 | 19-12-2019 | 6918 | B | 0 | 1.58 | 1.18 | 0.88 | -0.3  |
| F2 | 19-12-2019 | 7836 | B | 0 | 2.05 | 1.14 | 1.05 | -0.1  |
| F2 | 19-12-2019 | 8503 | B | 0 | 2.48 | 0.98 | 0.88 | -0.1  |
| F2 | 19-12-2019 | 7825 | B | 0 | 2.51 | 1.14 | 1.1  | 0     |
| F2 | 19-12-2019 | 8461 | B | 0 | 1.85 | 1.06 | 0.9  | -0.2  |
| F2 | 19-12-2019 | 7443 | B | 0 | 1.39 | 0.96 | 0.58 | -0.5  |
| F2 | 19-12-2019 | 7404 | B | 0 | 0.82 | 0.55 | 0.33 | -0.5  |
| F2 | 19-12-2019 | 8419 | B | 0 | 1.67 | 1.18 | 0.67 | -0.6  |
| F2 | 19-12-2019 | 7873 | B | 0 | 1.9  | 1.02 | 0.69 | -0.4  |
| F2 | 19-12-2019 | 7403 | B | 0 | 1.63 | 1.03 | 0.28 | -1.3  |
| F2 | 19-12-2019 | 7853 | B | 0 | 2.74 | 1.4  | 1.3  | -0.1  |
| F2 | 19-12-2019 | 7770 | B | 0 | 1.54 | 0.93 | 0.63 | -0.4  |
| F2 | 19-12-2019 | 7740 | B | 0 | 0.21 | 0.32 | 0.15 | -0.7  |
| F2 | 19-12-2019 | 8412 | B | 0 | 1.95 | 1.1  | 0.91 | -0.2  |
| F2 | 19-12-2019 | 7899 | B | 0 | 1.82 | 1.24 | 1    | -0.2  |
| F2 | 19-12-2019 | 7856 | B | 0 | 1.93 | 1.02 | 0.85 | -0.2  |
| F2 | 19-12-2019 | 7448 | B | 0 | 1.47 | 0.96 | 0.53 | -0.6  |
| F2 | 19-12-2019 | 8489 | B | 0 | 0.92 | 0.56 | 0.35 | -0.5  |
| F2 | 19-12-2019 | 8592 | B | 0 | 1.42 | 0.84 | 0.39 | -0.8  |
| F2 | 19-12-2019 | 8982 | B | 0 | 1.84 | 1.08 | 0.93 | -0.2  |

|    |            |       |   |   |      |      |      |      |
|----|------------|-------|---|---|------|------|------|------|
| F2 | 19-12-2019 | 8981  | B | 0 | 1.91 | 0.83 | 0.63 | -0.3 |
| F2 | 19-12-2019 | 8978  | B | 0 | 1.57 | 0.9  | 0.85 | -0.1 |
| F2 | 19-12-2019 | 8983  | B | 0 | 1.95 | 0.84 | 0.69 | -0.2 |
| F2 | 19-12-2019 | 8979  | B | 0 | 0.75 | 0.53 | 0.33 | -0.5 |
| F2 | 19-12-2019 | 8977  | B | 0 | 2.12 | 1.11 | 1.04 | -0.1 |
| F2 | 19-12-2019 | 8973  | B | 0 | 1.76 | 0.77 | 0.61 | -0.2 |
| F2 | 19-12-2019 | 8968  | B | 0 | 0.52 | 0.56 | 0.35 | -0.5 |
| F2 | 19-12-2019 | 8970  | B | 0 | 1.37 | 0.96 | 0.59 | -0.5 |
| F2 | 19-12-2019 | 8975  | B | 0 | 1.82 | 0.85 | 0.77 | -0.1 |
| F2 | 19-12-2019 | 8976  | B | 0 | 1.63 | 1.05 | 0.79 | -0.3 |
| F2 | 19-12-2019 | 8971  | B | 0 | 0.68 | 0.63 | 0.29 | -0.8 |
| F2 | 19-12-2019 | 8974  | B | 0 | 1.17 | 0.49 | 0.45 | -0.1 |
| F2 | 19-12-2019 | 8966  | B | 0 | 1.43 | 0.75 | 0.57 | -0.3 |
| F2 | 19-12-2019 | 8967  | B | 0 | 1.65 | 0.89 | 0.72 | -0.2 |
| F2 | 19-12-2019 | 8969  | B | 0 | 1.96 | 1.13 | 1.13 | 0    |
| F2 | 19-12-2019 | 8972  | B | 0 | 1.97 | 0.98 | 0.79 | -0.2 |
| F2 | 19-12-2019 | 8921  | B | 0 | 1.65 | 0.93 | 0.76 | -0.2 |
| F1 | 19-12-2019 | 3602  | Y | 0 |      |      |      |      |
| F1 | 19-12-2019 | 3989  | Y | 0 |      |      |      |      |
| F1 | 19-12-2019 | 3990  | Y | 0 |      |      |      |      |
| F1 | 19-12-2019 | 3991  | Y | 0 |      |      |      |      |
| F1 | 19-12-2019 | 3992  | Y | 0 |      |      |      |      |
| F1 | 19-12-2019 | 3993  | Y | 0 |      |      |      |      |
| F1 | 19-12-2019 | 3994  | Y | 0 |      |      |      |      |
| F1 | 19-12-2019 | 3995  | Y | 0 |      |      |      |      |
| F1 | 19-12-2019 | 3996  | Y | 0 |      |      |      |      |
| F1 | 19-12-2019 | 3997  | Y | 0 |      |      |      |      |
| F1 | 19-12-2019 | 3999  | Y | 0 |      |      |      |      |
| F1 | 19-12-2019 | 4000  | Y | 0 |      |      |      |      |
| F1 | 19-12-2019 | 1984  | Y | 0 |      |      |      |      |
| F1 | 19-12-2019 | 1478  | Y | 0 |      |      |      |      |
| F1 | 19-12-2019 | 1885  | Y | 0 |      |      |      |      |
| F1 | 19-12-2019 | 1207  | Y | 0 |      |      |      |      |
| F1 | 19-12-2019 | 2076  | Y | 0 |      |      |      |      |
| F1 | 19-12-2019 | 2050  | Y | 0 |      |      |      |      |
| F1 | 19-12-2019 | 1996  | Y | 0 |      |      |      |      |
| F1 | 19-12-2019 | 1566  | Y | 0 |      |      |      |      |
| F1 | 19-12-2019 | 10196 | Y | 0 |      |      |      |      |
| F1 | 19-12-2019 | 2011  | Y | 0 |      |      |      |      |
| F1 | 19-12-2019 | 2504  | Y | 0 |      |      |      |      |
| F1 | 19-12-2019 | 2484  | Y | 0 |      |      |      |      |
| F1 | 19-12-2019 | 2441  | Y | 0 |      |      |      |      |
| F1 | 19-12-2019 | 2461  | Y | 0 |      |      |      |      |
| F1 | 19-12-2019 | 3006  | Y | 0 |      |      |      |      |
| F1 | 19-12-2019 | 3059  | Y | 0 |      |      |      |      |
| F1 | 19-12-2019 | 3087  | Y | 0 |      |      |      |      |
| F1 | 19-12-2019 | 3123  | Y | 0 |      |      |      |      |
| F1 | 19-12-2019 | 3117  | Y | 0 |      |      |      |      |
| F1 | 19-12-2019 | 3020  | Y | 0 |      |      |      |      |
| F1 | 19-12-2019 | 3572  | Y | 0 |      |      |      |      |
| F1 | 19-12-2019 | 3099  | Y | 0 |      |      |      |      |

|    |            |      |   |   |
|----|------------|------|---|---|
| F1 | 19-12-2019 | 3049 | Y | 0 |
| F1 | 19-12-2019 | 2950 | Y | 0 |
| F1 | 19-12-2019 | 3558 | Y | 0 |
| F1 | 19-12-2019 | 2492 | Y | 0 |
| F1 | 19-12-2019 | 1970 | Y | 0 |
| F1 | 19-12-2019 | 2576 | Y | 0 |
| F1 | 19-12-2019 | 3617 | Y | 0 |
| F1 | 19-12-2019 | 3016 | Y | 0 |
| F1 | 19-12-2019 | 3032 | Y | 0 |
| F1 | 19-12-2019 | 3131 | Y | 0 |
| F1 | 19-12-2019 | 2564 | Y | 0 |
| F1 | 19-12-2019 | 3142 | Y | 0 |
| F1 | 19-12-2019 | 3544 | Y | 0 |
| F1 | 19-12-2019 | 3056 | Y | 0 |
| F1 | 19-12-2019 | 2539 | Y | 0 |
| F1 | 19-12-2019 | 3608 | Y | 0 |
| F1 | 19-12-2019 | 3446 | Y | 0 |
| F1 | 19-12-2019 | 2530 | Y | 0 |
| F1 | 19-12-2019 | 2354 | Y | 0 |
| F1 | 19-12-2019 | 3560 | Y | 0 |
| F1 | 19-12-2019 | 2480 | Y | 0 |
| F1 | 19-12-2019 | 3057 | Y | 0 |
| F1 | 19-12-2019 | 2542 | Y | 0 |
| F1 | 19-12-2019 | 3063 | Y | 0 |
| F1 | 19-12-2019 | 3046 | Y | 0 |
| F1 | 19-12-2019 | 3581 | Y | 0 |
| F1 | 19-12-2019 | 3086 | Y | 0 |
| F1 | 19-12-2019 | 2459 | Y | 0 |
| F1 | 19-12-2019 | 3546 | Y | 0 |
| F1 | 19-12-2019 | 3019 | Y | 0 |
| F1 | 19-12-2019 | 1943 | Y | 0 |
| F1 | 19-12-2019 | 1975 | Y | 0 |
| F1 | 19-12-2019 | 3961 | Y | 0 |
| F1 | 19-12-2019 | 3025 | Y | 0 |
| F1 | 19-12-2019 | 2485 | Y | 0 |
| F1 | 19-12-2019 | 1957 | Y | 0 |
| F1 | 19-12-2019 | 2440 | Y | 0 |
| F1 | 19-12-2019 | 2051 | Y | 0 |
| F1 | 19-12-2019 | 3074 | Y | 0 |
| F1 | 19-12-2019 | 2960 | Y | 0 |
| F1 | 19-12-2019 | 3910 | Y | 0 |
| F1 | 19-12-2019 | 2434 | Y | 0 |
| F1 | 19-12-2019 | 1324 | Y | 0 |
| F1 | 19-12-2019 | 2972 | Y | 0 |
| F1 | 19-12-2019 | 1500 | Y | 0 |
| F1 | 19-12-2019 | 2980 | Y | 0 |
| F1 | 19-12-2019 | 1959 | Y | 0 |
| F1 | 19-12-2019 | 2490 | Y | 0 |
| F1 | 19-12-2019 | 2489 | Y | 0 |
| F1 | 19-12-2019 | 3958 | Y | 0 |
| F1 | 19-12-2019 | 2436 | Y | 0 |

|    |            |      |   |   |
|----|------------|------|---|---|
| F1 | 19-12-2019 | 2986 | Y | 0 |
| F1 | 19-12-2019 | 3101 | Y | 0 |
| F1 | 19-12-2019 | 2472 | Y | 0 |
| F1 | 19-12-2019 | 2007 | Y | 0 |
| F1 | 19-12-2019 | 1954 | Y | 0 |
| F1 | 19-12-2019 | 3964 | Y | 0 |
| F1 | 19-12-2019 | 1484 | Y | 0 |
| F1 | 19-12-2019 | 2449 | Y | 0 |
| F1 | 19-12-2019 | 2349 | Y | 0 |
| F1 | 19-12-2019 | 1475 | Y | 0 |
| F1 | 19-12-2019 | 3072 | Y | 0 |
| F1 | 19-12-2019 | 3955 | Y | 0 |
| F1 | 19-12-2019 | 2426 | Y | 0 |
| F1 | 19-12-2019 | 3957 | Y | 0 |
| F1 | 19-12-2019 | 3953 | Y | 0 |
| F1 | 19-12-2019 | 3023 | Y | 0 |
| F1 | 19-12-2019 | 2432 | Y | 0 |
| F1 | 19-12-2019 | 2355 | Y | 0 |
| F1 | 19-12-2019 | 2466 | Y | 0 |
| F1 | 19-12-2019 | 3956 | Y | 0 |
| F1 | 19-12-2019 | 2381 | Y | 0 |
| F1 | 19-12-2019 | 3547 | Y | 0 |
| F1 | 19-12-2019 | 3551 | Y | 0 |
| F1 | 19-12-2019 | 3013 | Y | 0 |
| F1 | 19-12-2019 | 1151 | Y | 0 |
| F1 | 19-12-2019 | 2973 | Y | 0 |
| F1 | 19-12-2019 | 3549 | Y | 0 |
| F1 | 19-12-2019 | 3954 | Y | 0 |
| F1 | 19-12-2019 | 3034 | Y | 0 |
| F1 | 19-12-2019 | 1438 | Y | 0 |
| F1 | 19-12-2019 | 3553 | Y | 0 |
| F1 | 19-12-2019 | 1966 | Y | 0 |
| F1 | 19-12-2019 | 2997 | Y | 0 |
| F1 | 19-12-2019 | 3550 | Y | 0 |
| F1 | 19-12-2019 | 3959 | Y | 0 |
| F2 | 19-12-2019 | 9013 | Y | 0 |
| F2 | 19-12-2019 | 9011 | Y | 0 |
| F2 | 19-12-2019 | 9012 | Y | 0 |
| F2 | 19-12-2019 | 9020 | Y | 0 |
| F2 | 19-12-2019 | 9018 | Y | 0 |
| F2 | 19-12-2019 | 9015 | Y | 0 |
| F2 | 19-12-2019 | 9009 | Y | 0 |
| F2 | 19-12-2019 | 9017 | Y | 0 |
| F2 | 19-12-2019 | 9010 | Y | 0 |
| F2 | 19-12-2019 | 9019 | Y | 0 |
| F2 | 19-12-2019 | 9016 | Y | 0 |
| F2 | 19-12-2019 | 9014 | Y | 0 |
| F2 | 19-12-2019 | 6964 | Y | 0 |
| F2 | 19-12-2019 | 6532 | Y | 0 |
| F2 | 19-12-2019 | 6902 | Y | 0 |
| F2 | 19-12-2019 | 7521 | Y | 0 |

|    |            |      |   |   |
|----|------------|------|---|---|
| F2 | 19-12-2019 | 7485 | Y | 0 |
| F2 | 19-12-2019 | 7880 | Y | 0 |
| F2 | 19-12-2019 | 7453 | Y | 0 |
| F2 | 19-12-2019 | 7018 | Y | 0 |
| F2 | 19-12-2019 | 7399 | Y | 0 |
| F2 | 19-12-2019 | 7911 | Y | 0 |
| F2 | 19-12-2019 | 7901 | Y | 0 |
| F2 | 19-12-2019 | 7886 | Y | 0 |
| F2 | 19-12-2019 | 7423 | Y | 0 |
| F2 | 19-12-2019 | 7425 | Y | 0 |
| F2 | 19-12-2019 | 7732 | Y | 0 |
| F2 | 19-12-2019 | 6533 | Y | 0 |
| F2 | 19-12-2019 | 7456 | Y | 0 |
| F2 | 19-12-2019 | 7885 | Y | 0 |
| F2 | 19-12-2019 | 8485 | Y | 0 |
| F2 | 19-12-2019 | 7424 | Y | 0 |
| F2 | 19-12-2019 | 7361 | Y | 0 |
| F2 | 19-12-2019 | 7844 | Y | 0 |
| F2 | 19-12-2019 | 6945 | Y | 0 |
| F2 | 19-12-2019 | 7920 | Y | 0 |
| F2 | 19-12-2019 | 7883 | Y | 0 |
| F2 | 19-12-2019 | 6257 | Y | 0 |
| F2 | 19-12-2019 | 6962 | Y | 0 |
| F2 | 19-12-2019 | 7388 | Y | 0 |
| F2 | 19-12-2019 | 6983 | Y | 0 |
| F2 | 19-12-2019 | 6931 | Y | 0 |
| F2 | 19-12-2019 | 7503 | Y | 0 |
| F2 | 19-12-2019 | 7887 | Y | 0 |
| F2 | 19-12-2019 | 6924 | Y | 0 |
| F2 | 19-12-2019 | 6892 | Y | 0 |
| F2 | 19-12-2019 | 7513 | Y | 0 |
| F2 | 19-12-2019 | 7409 | Y | 0 |
| F2 | 19-12-2019 | 7982 | Y | 0 |
| F2 | 19-12-2019 | 7413 | Y | 0 |
| F2 | 19-12-2019 | 7909 | Y | 0 |
| F2 | 19-12-2019 | 7450 | Y | 0 |
| F2 | 19-12-2019 | 8501 | Y | 0 |
| F2 | 19-12-2019 | 8516 | Y | 0 |
| F2 | 19-12-2019 | 7861 | Y | 0 |
| F2 | 19-12-2019 | 8467 | Y | 0 |
| F2 | 19-12-2019 | 7951 | Y | 0 |
| F2 | 19-12-2019 | 8490 | Y | 0 |
| F2 | 19-12-2019 | 8498 | Y | 0 |
| F2 | 19-12-2019 | 8574 | Y | 0 |
| F2 | 19-12-2019 | 7831 | Y | 0 |
| F2 | 19-12-2019 | 7858 | Y | 0 |
| F2 | 19-12-2019 | 8513 | Y | 0 |
| F2 | 19-12-2019 | 8439 | Y | 0 |
| F2 | 19-12-2019 | 7912 | Y | 0 |
| F2 | 19-12-2019 | 7819 | Y | 0 |
| F2 | 19-12-2019 | 8434 | Y | 0 |

|    |            |      |   |   |
|----|------------|------|---|---|
| F2 | 19-12-2019 | 8483 | Y | 0 |
| F2 | 19-12-2019 | 8423 | Y | 0 |
| F2 | 19-12-2019 | 8507 | Y | 0 |
| F2 | 19-12-2019 | 8430 | Y | 0 |
| F2 | 19-12-2019 | 6916 | Y | 0 |
| F2 | 19-12-2019 | 7868 | Y | 0 |
| F2 | 19-12-2019 | 7888 | Y | 0 |
| F2 | 19-12-2019 | 8450 | Y | 0 |
| F2 | 19-12-2019 | 7846 | Y | 0 |
| F2 | 19-12-2019 | 7345 | Y | 0 |
| F2 | 19-12-2019 | 7408 | Y | 0 |
| F2 | 19-12-2019 | 7877 | Y | 0 |
| F2 | 19-12-2019 | 7894 | Y | 0 |
| F2 | 19-12-2019 | 7904 | Y | 0 |
| F2 | 19-12-2019 | 7827 | Y | 0 |
| F2 | 19-12-2019 | 7931 | Y | 0 |
| F2 | 19-12-2019 | 6918 | Y | 0 |
| F2 | 19-12-2019 | 7836 | Y | 0 |
| F2 | 19-12-2019 | 8503 | Y | 0 |
| F2 | 19-12-2019 | 7825 | Y | 0 |
| F2 | 19-12-2019 | 8461 | Y | 0 |
| F2 | 19-12-2019 | 7443 | Y | 0 |
| F2 | 19-12-2019 | 7404 | Y | 0 |
| F2 | 19-12-2019 | 8419 | Y | 0 |
| F2 | 19-12-2019 | 7873 | Y | 0 |
| F2 | 19-12-2019 | 7403 | Y | 0 |
| F2 | 19-12-2019 | 7853 | Y | 0 |
| F2 | 19-12-2019 | 7770 | Y | 0 |
| F2 | 19-12-2019 | 7740 | Y | 0 |
| F2 | 19-12-2019 | 8412 | Y | 0 |
| F2 | 19-12-2019 | 7899 | Y | 0 |
| F2 | 19-12-2019 | 7856 | Y | 0 |
| F2 | 19-12-2019 | 7448 | Y | 0 |
| F2 | 19-12-2019 | 8489 | Y | 0 |
| F2 | 19-12-2019 | 8592 | Y | 0 |
| F2 | 19-12-2019 | 8982 | Y | 0 |
| F2 | 19-12-2019 | 8981 | Y | 0 |
| F2 | 19-12-2019 | 8978 | Y | 0 |
| F2 | 19-12-2019 | 8983 | Y | 0 |
| F2 | 19-12-2019 | 8979 | Y | 0 |
| F2 | 19-12-2019 | 8977 | Y | 0 |
| F2 | 19-12-2019 | 8973 | Y | 0 |
| F2 | 19-12-2019 | 8968 | Y | 0 |
| F2 | 19-12-2019 | 8970 | Y | 0 |
| F2 | 19-12-2019 | 8975 | Y | 0 |
| F2 | 19-12-2019 | 8976 | Y | 0 |
| F2 | 19-12-2019 | 8971 | Y | 0 |
| F2 | 19-12-2019 | 8974 | Y | 0 |
| F2 | 19-12-2019 | 8966 | Y | 0 |
| F2 | 19-12-2019 | 8967 | Y | 0 |
| F2 | 19-12-2019 | 8969 | Y | 0 |

|    |            |      |   |       |        |
|----|------------|------|---|-------|--------|
| F2 | 19-12-2019 | 8972 | Y | 0     |        |
| F2 | 19-12-2019 | 8921 | Y | 0     |        |
| N1 | 03-12-2019 | 4    | S | 0     |        |
| N1 | 03-12-2019 | 3    | S | 0     |        |
| N1 | 03-12-2019 | 5    | S | 0     |        |
| N1 | 03-12-2019 | 17   | S | 0     |        |
| N1 | 03-12-2019 | 16   | S | 0     |        |
| N1 | 03-12-2019 | 15   | S | 0     |        |
| N1 | 03-12-2019 | 14   | S | 0     |        |
| N1 | 03-12-2019 | 13   | S | 38.96 | PRRSV1 |
| N1 | 03-12-2019 | 10   | S | 31.86 | PRRSV2 |
| N1 | 03-12-2019 | 0    | S | 31.16 | PRRSV2 |
| N2 | 03-12-2019 | 10   | S | 0     |        |
| N2 | 03-12-2019 | 9    | S | 0     |        |
| N2 | 03-12-2019 | 8    | S | 0     |        |
| N2 | 03-12-2019 | 7    | S | 0     |        |
| N2 | 03-12-2019 | 6    | S | 0     |        |
| N2 | 03-12-2019 | 5    | S | 0     |        |
| N2 | 03-12-2019 | 4    | S | 0     |        |
| N2 | 03-12-2019 | 3    | S | 32.14 | PRRSV2 |
| N2 | 03-12-2019 | 2    | S | 0     |        |
| N2 | 03-12-2019 | 1    | S | 0     |        |
| N1 | 19-12-2019 | 4    | S | 0     |        |
| N1 | 19-12-2019 | 3    | S | 0     |        |
| N1 | 19-12-2019 | 5    | S | 0     |        |
| N1 | 19-12-2019 | 17   | S | 0     |        |
| N1 | 19-12-2019 | 16   | S | 0     |        |
| N1 | 19-12-2019 | 15   | S | 0     |        |
| N1 | 19-12-2019 | 14   | S | 0     |        |
| N1 | 19-12-2019 | 13   | S | 0     |        |
| N1 | 19-12-2019 | 8    | S | 0     |        |
| N1 | 19-12-2019 | 9    | S | 0     |        |
| N1 | 19-12-2019 | 10   | S | 0     |        |
| N1 | 19-12-2019 | 11   | S | 0     |        |
| N1 | 19-12-2019 | 12   | S | 0     |        |
| N2 | 19-12-2019 | 10   | S | 0     |        |
| N2 | 19-12-2019 | 9    | S | 0     |        |
| N2 | 19-12-2019 | 8    | S | 0     |        |
| N2 | 19-12-2019 | 7    | S | 0     |        |
| N2 | 19-12-2019 | 6    | S | 37.81 | PRRSV2 |
| N2 | 19-12-2019 | 3    | S | 0     |        |
| N2 | 19-12-2019 | 2    | S | 0     |        |
| N2 | 19-12-2019 | 1    | S | 0     |        |
| N1 | 25-02-2020 | 3    | S | 0     |        |
| N1 | 25-02-2020 | 4    | S | 0     |        |
| N1 | 25-02-2020 | 5    | S | 0     |        |
| N1 | 25-02-2020 | 8    | S | 35.39 | PRRSV2 |
| N1 | 25-02-2020 | 9    | S | 0     |        |
| N1 | 25-02-2020 | 10   | S | 0     |        |
| N1 | 25-02-2020 | 11   | S | 0     |        |
| N1 | 25-02-2020 | 12   | S | 0     |        |



|    |            |    |   |       |        |
|----|------------|----|---|-------|--------|
| N1 | 25-02-2020 | 13 | S | 29.46 | PRRSV2 |
| N1 | 25-02-2020 | 14 | S | 28.73 | PRRSV2 |
| N1 | 25-02-2020 | 15 | S | 29.92 | PRRSV2 |
| N1 | 25-02-2020 | 16 | S | 0     |        |
| N1 | 25-02-2020 | 17 | S | 0     |        |
| N2 | 25-02-2020 | 1  | S | 0     |        |
| N2 | 25-02-2020 | 2  | S | 0     |        |
| N2 | 25-02-2020 | 3  | S | 0     |        |
| N2 | 25-02-2020 | 9  | S | 33.83 | PRRSV1 |
| G2 | 25-02-2020 | 10 | S | 33.28 | PRRSV1 |

Table S2 – Dichotomous results of serological assays.

**Table S2.** Dichotomous PRRSV-1 S/P antibody results in Idexx ELISA and MFIA before and after PRRSV-1 MLV mass vaccination in the study of two herds.

|                              |                      |                      |     |
|------------------------------|----------------------|----------------------|-----|
| F1 - before vaccination      |                      |                      |     |
|                              | Idexx ELISA positive | Idexx ELISA negative | Sum |
| MFIA-positive                | 90                   | 3                    | 93  |
| MFIA-negative                | 4                    | 15                   | 19  |
| Sum                          | 94                   | 18                   | 112 |
| F1 - after vaccination       |                      |                      |     |
|                              | Idexx ELISA positive | Idexx ELISA negative | Sum |
| MFIA-positive                | 96                   | 1                    | 97  |
| MFIA-negative                | 2                    | 3                    | 5   |
| Sum                          | 98                   | 4                    | 102 |
| F2 - before vaccination      |                      |                      |     |
|                              | Idexx ELISA positive | Idexx ELISA negative | Sum |
| MFIA-positive                | 101                  | 2                    | 103 |
| MFIA-negative                | 4                    | 7                    | 11  |
| Sum                          | 105                  | 9                    | 114 |
| F2 - after vaccination       |                      |                      |     |
|                              | Idexx ELISA positive | Idexx ELISA negative | Sum |
| MFIA-positive                | 107                  | 1                    | 108 |
| MFIA-negative                | 0                    | 1                    | 1   |
| Sum                          | 107                  | 2                    | 109 |
| F1 + F2 - before vaccination |                      |                      |     |
|                              | Idexx ELISA positive | Idexx ELISA negative | Sum |
| MFIA-positive                | 191                  | 5                    | 196 |
| MFIA-negative                | 8                    | 22                   | 30  |
| Sum                          | 199                  | 27                   | 226 |
| F1 + F2 - after vaccination  |                      |                      |     |
|                              | Idexx ELISA positive | Idexx ELISA negative | Sum |
| MFIA-positive                | 203                  | 2                    | 205 |
| MFIA-negative                | 2                    | 4                    | 6   |
| Sum                          | 205                  | 6                    | 211 |

Table S3 – Spearman's Correlation

**Table S3.** Results of the spearman correlation test between results of PRRSV-1 S/P-value in both Idexx ELISA (x-axis) and MFIA (y-axis) before (–2DPV) and after PRRSV-1 MLV mass vaccination (WPV2) in farm 1 (F1) and farm 2 (F2), and in total for both herds (both) in the study. Spearman's correlation coefficients for the monotonic relationship ( $r_s$ ), P-value ( $p$ ) and 95% confidence interval (95% CI) are presented.

| Spearman's correlation |       |           |         |       |           |         |       |           |         |
|------------------------|-------|-----------|---------|-------|-----------|---------|-------|-----------|---------|
|                        | F1    |           |         | F2    |           |         | Both  |           |         |
| Time                   | $r_s$ | 95% CI    | $p$     | $r_s$ | 95% CI    | $p$     | $r_s$ | 95% CI    | $p$     |
| -2DPV                  | 0.88  | 0.83-0.92 | <0.0001 | 0.88  | 0.83-0.92 | <0.0001 | 0.89  | 0.85-0.91 | <0.0001 |
| WPV2                   | 0.81  | 0.73-0.87 | <0.0001 | 0.86  | 0.80-0.90 | <0.0001 | 0.83  | 0.79-0.87 | <0.0001 |
| Total                  | 0.86  | 0.83-0.90 | <0.0001 | 0.92  | 0.89-0.93 | <0.0001 | 0.89  | 0.87-0.91 | <0.0001 |

Table S4 – Cohen's Kappa agreement

Cohen's kappa agreement coefficient ( $\kappa$ ) between PRRSV-1 S/P antibody results in Idexx ELISA and MFIA before (-2DPV) and after PRRSV-1 MLV mass vaccination (WPV2) and in total for both serologic assays in the study of two herds (F1 and F2). Furthermore, standard error (SE), 95% confidence intervals (95% CI), observed agreements chance in numerical values and proportion and observed agreements by chance in numerical values and proportion.

| F1    |          |      |           |                     |                |
|-------|----------|------|-----------|---------------------|----------------|
|       | $\kappa$ | SE   | 95% CI    | Observed agreements | ... by chance  |
| -2DPV | 0.77     | 0.08 | 0.61-0.93 | 105 (93.75%)        | 81.1 (72.42%)  |
| WPV2  | 0.65     | 0.18 | 0.28-1.00 | 99 (97.06%)         | 93.4 (91.56%)  |
| Total | 0.76     | 0.07 | 0.61-0.90 | 204 (95.33%)        | 172.9 (80.81%) |

| F2    |          |      |           |                     |                |
|-------|----------|------|-----------|---------------------|----------------|
|       | $\kappa$ | SE   | 95% CI    | Observed agreements | ... by chance  |
| -2DPV | 0.67     | 0.13 | 0.43-0.92 | 108 (94.74%)        | 95.7 (83.98%)  |
| WPV2  | 0.66     | 0.32 | 0.04-1.00 | 108 (99.08%)        | 106.0 (97.28%) |
| Total | 0.68     | 0.11 | 0.46-0.90 | 216 (96.87%)        | 201.2 (90.22%) |
